# Supplementary material for: Mechanisms of Hydrogen Transport in Flexible‐Wall Narrow Carbon Nanotubes
Source: Hindawi journal article supplement (doi:10.1155/2015/959402), 2015-01-01
Supplement: f1 [file 959402.f1.zip]

Archive with 2 entries (2 files):
- 800K top-s  A1.avi
- 800K side-s  A2.avi
